# Supplementary material
Source: HighWire-hosted journal article supplement (https://www.cmajopen.ca/highwire/filestream/88926/field_highwire_adjunct_files/5/open-2022-0118-gripp-checklist.pdf)
Supplement: open-2022-0118-gripp-checklist.pdf [file open-2022-0118-gripp-checklist.pdf]

### GRIPP2-Short Form Checklist

| <b>Section and topic</b>            | <b>Item</b>                                                                                                                               | <b>Reported on page No</b> |
|-------------------------------------|-------------------------------------------------------------------------------------------------------------------------------------------|----------------------------|
| 1: Aim                              | Report the aim of PPI in the study                                                                                                        | 4 and 5                    |
| 2: Methods                          | Provide a clear description of the methods used for PPI in the study                                                                      | 5                          |
| 3: Study results                    | Outcomes—Report the results of PPI in the study, including both positive and negative outcomes                                            | 10                         |
| 4: Discussion and conclusions       | Outcomes—Comment on the extent to which PPI influenced the study overall. Describe positive and negative effects                          | 5, 9, and 10               |
| 5: Reflections/critical perspective | Comment critically on the study, reflecting on the things that went well and those that did not, so others can learn from this experience | 9 and 10                   |

Abbreviation: PPI, patient and public involvement
